# Supplementary material
Source: MDPI journal article supplement (https://www.mdpi.com/2227-9040/11/1/19)
Supplement: s1 [file s1]

## Supplementary Materials

*For*

### **Selective detection of folic acid using a water-stable fluorescent CsPbBr<sub>3</sub>/Cs<sub>4</sub>PbBr<sub>6</sub> perovskite nanocrystal probe**

*Wen-Zhi She, Rui-Xian Zhao, Jin-Zhou Liu, Hai-Chi Zhang, Rong Sheng Li, Meng-Ting Liu, Chuan-Hua Zhou, Jian Ling\*, Qiue Cao*

Key Laboratory of Medicinal Chemistry for Natural Resource (Yunnan University), Ministry of Education, National Demonstration Center for Experimental Chemistry and Chemical Engineering Education (Yunnan University), School of Chemical Science and Technology, Yunnan University, Kunming 650091, China

\*Corresponding authors. Email: lingjian@ynu.edu.cn (J. Ling); Tel, +86-871-65033719; Fax, +86-871-65033679

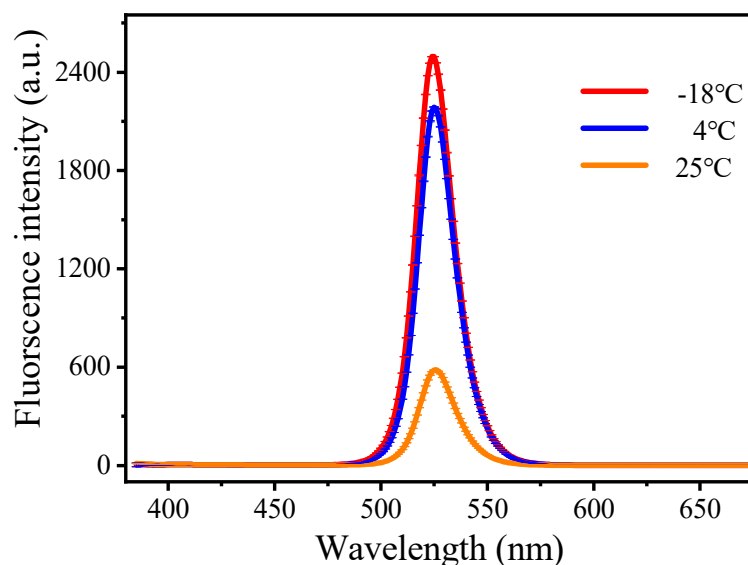

**Figure S1.** Effect of precursor reaction temperature on fluorescence intensity of CsPbBr<sub>3</sub>/Cs<sub>4</sub>PbBr<sub>6</sub> PNCs. Experimental conditions: Synthetic precursors: CsBr (45.4 mM), PbBr<sub>2</sub> (45.4 mM), N-6-trifluoroacetyl-L-lysine (4.54 mM), reaction time: 2.5 h, reaction temperature: 25 °C, 4°C, -18°C; Synthesis of CsPbBr<sub>3</sub>/Cs<sub>4</sub>PbBr<sub>6</sub> PNCs: OLA (250 μL), precursor (1.375 mL) Reaction time: 20 min, reaction temperature: 25°C.

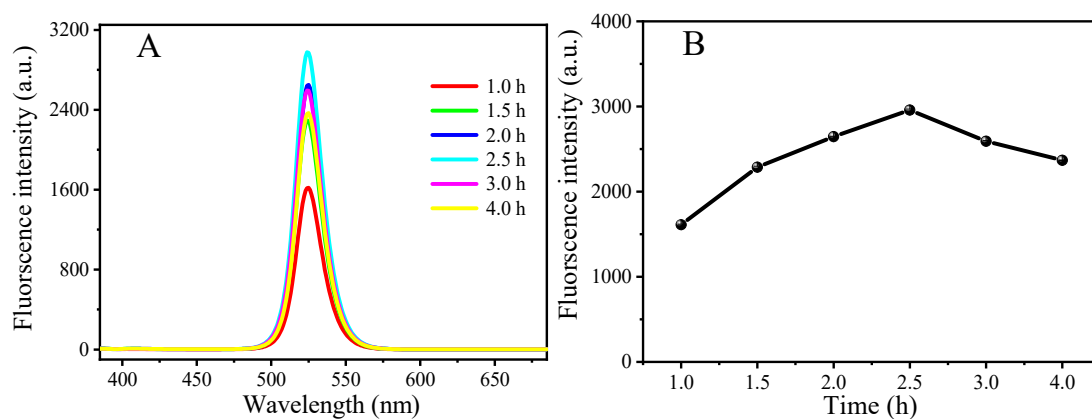

**Figure S2.** The effect of precursor reaction time on the fluorescence intensity of CsPbBr<sub>3</sub>/Cs<sub>4</sub>PbBr<sub>6</sub> PNCs (A and B). Experimental conditions: Synthetic precursors: CsBr (45.4 mM), PbBr<sub>2</sub> (45.4 mM), N-6-trifluoroacetyl-L-lysine (4.54 mM), reaction time: 1.0 h, 1.5 h, 2.0 h, 2.5 h, 3.0 h, 4.0 h, reaction temperature: -18 °C; synthesis of CsPbBr<sub>3</sub>/Cs<sub>4</sub>PbBr<sub>6</sub> PNCs: OLA (250 μL), precursor (1.375 mL), reaction time: 20 min, reaction temperature: 25 °C.

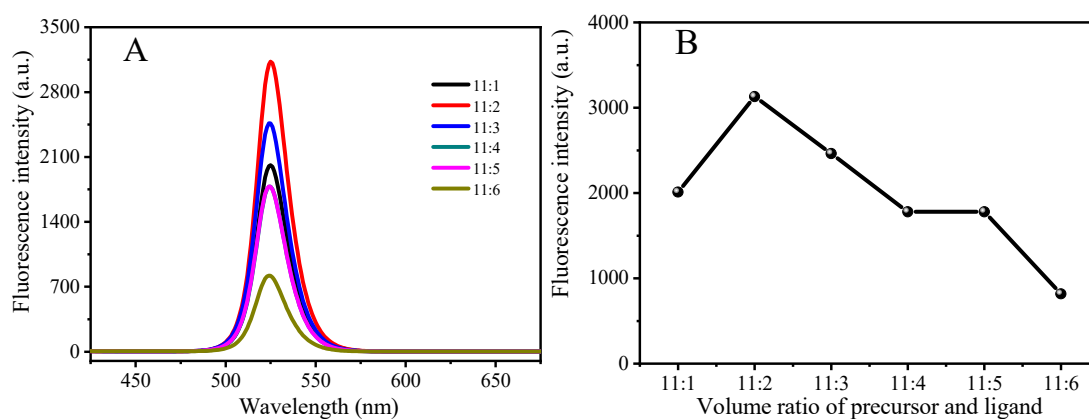

**Figure S3.** Effect of volume ratio of precursor to ligand on the fluorescence intensity of CsPbBr<sub>3</sub>/Cs<sub>4</sub>PbBr<sub>6</sub> PNCs (A and B). Experimental conditions: Synthetic precursors: CsBr (45.4 mM), PbBr<sub>2</sub> (45.4 mM), N-6-trifluoroacetyl-L-lysine (4.54 mM), reaction time: 2.5 h, reaction temperature: -18 °C ; Synthesis of CsPbBr<sub>3</sub>/Cs<sub>4</sub>PbBr<sub>6</sub> PNCs: OLA (125 μL, 250 μL, 375 μL, 500 μL, 625 μL, 750 μL), precursor (1.375 mL) Reaction time: 20 min, reaction temperature: 25°C.

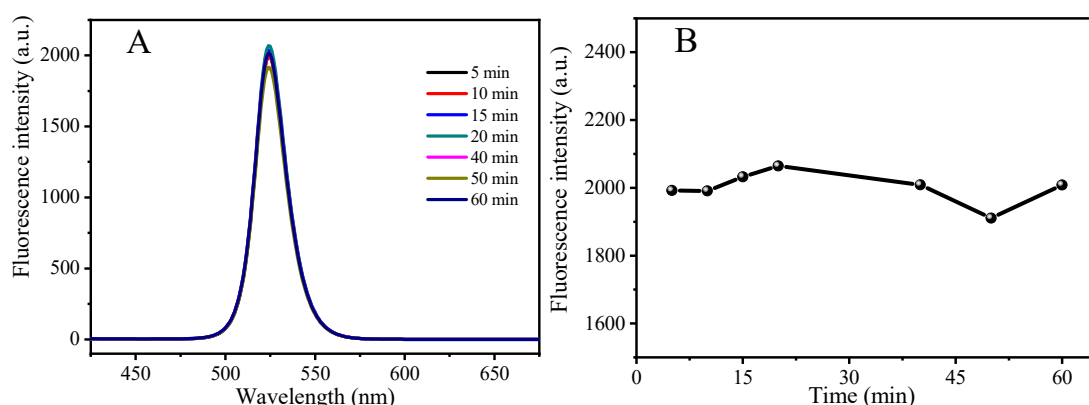

**Figure S4.** The effect of reaction time of precursor and ligand on the fluorescence intensity of CsPbBr<sub>3</sub>/Cs<sub>4</sub>PbBr<sub>6</sub> PNCs (A and B). Experimental conditions: Synthetic precursors: CsBr (45.4 mM), PbBr<sub>2</sub> (45.4 mM), N-6-trifluoroacetyl-L-lysine (4.54 mM), reaction time: 2.5 h, reaction temperature: -18 °C ; Synthesis of CsPbBr<sub>3</sub>/Cs<sub>4</sub>PbBr<sub>6</sub> PNCs: OLA (250 μL), precursor (1.375 mL) Reaction time: 5, 10, 15, 20, 40, 50 and 60 min, reaction temperature: 25°C

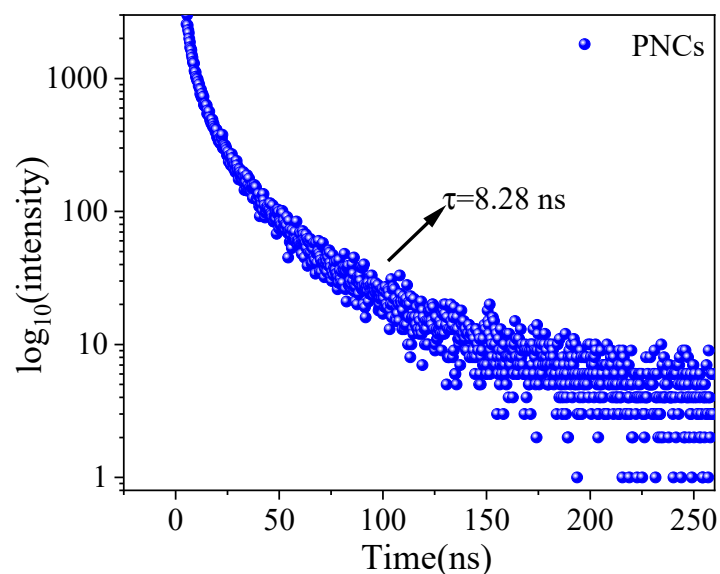

**Figure S5.** Fluorescence lifetime map of CsPbBr<sub>3</sub>/Cs<sub>4</sub>PbBr<sub>6</sub> PNCs. Experimental conditions: Synthetic precursors: CsBr (45.4 mM), PbBr<sub>2</sub> (45.4 mM), N-6-trifluoroacetyl-L-lysine (4.54 mM), reaction time: 2.5 h, reaction temperature: -18 °C ; Synthesis of CsPbBr<sub>3</sub>/Cs<sub>4</sub>PbBr<sub>6</sub> PNCs: OLA (250 μL), precursor (1.375 mL) Reaction time: 20 min, reaction temperature: 25°C.

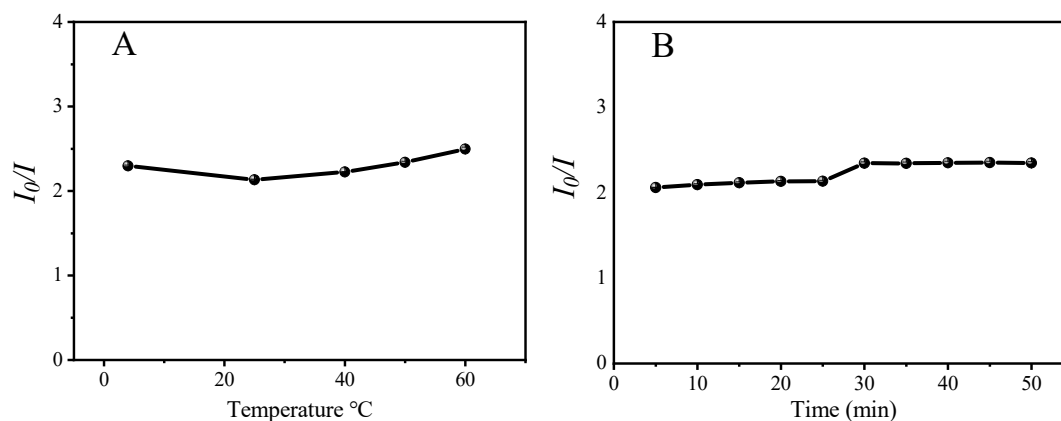

**Figure S6.** Optimization of temperature (A) and time (B) for detection of FA by CsPbBr<sub>3</sub>/Cs<sub>4</sub>PbBr<sub>6</sub> PNCs. Experimental conditions: the concentration of CsPbBr<sub>3</sub>/Cs<sub>4</sub>PbBr<sub>6</sub> PNCs (0.156 mmol, in terms of Cs atoms), the concentration of FA is 200 μM; (A) reaction temperature: 4-60 °C; response time: 15 min; (B) reaction temperature: 25 °C, response time: 5-50 min.

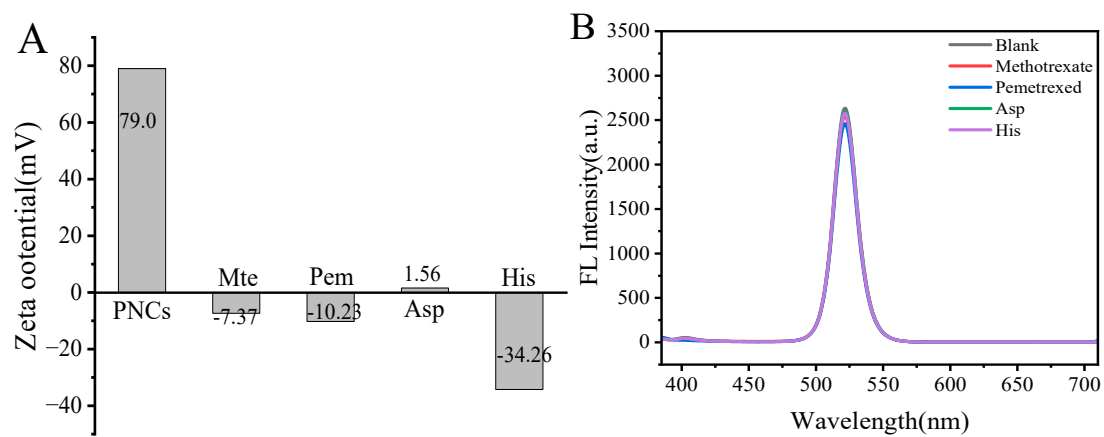

**Figure S7.** Zeta potential of different molecules and the PNCs (A); Effects of four similar molecules on the fluorescence intensity of the PNCs (B). Experimental conditions: The concentration of the four molecules was 200  $\mu$ M.
